# Supplementary material for: Short-termed changes in quantitative ultrasound estimated bone density among young men in an 18-weeks follow-up during their basic training for the Swiss Armed Forces
Source: PeerJ. 2023 Apr 6;11:e15205. doi: 10.7717/peerj.15205 (PMC10083003; doi:10.7717/peerj.15205)
Supplement: Supplemental Information 2 [file peerj-11-15205-s002.xlsx]

## Sheet: Data
N	Cigarettes/day	Occpuation	total-physical-activity-MET-1	military_total-physical-activity-MET-2	Type of sport	Sport continued	max_Gripstrength-1	max_Gripstrength-2	BMI value-1	Relative fat mass value-1	Absolute fat mass value-1	Fat-free mass value	Skeletal muscle mass value-1	SMM (torso) value-1	SMM (RL) value-1	SMM (LL) value-1	SMM (LA) value-1	SMM (RA) value-1	Total Body Water value-1	Extracellular water value-1	waist circumference value-1	Weight value-1	Height value-1	Total energy expenditure value-1	visceral adipose tissue value-1	BMI value-2	Relative fat mass value-2	Absolute fat mass value-2	Fat-free mass value-2	Skeletal muscle mass value-2	SMM (torso) value-2	SMM (RL) value-2	SMM (LL) value-2	SMM (LA) value-2	SMM (RA) value-2	Total Body Water value-2	Extracellular water value-2	waist circumference value-2	Weight value-2	Height value-2	Total energy expenditure value-2	visceral adipose tissue value-2	SOS-1	BUA-1	BQI-1	SOS-2	BUA-2	BQI-2
1	15	Mason	26400	3840	Floorball	less	84	90	20.13	5.66	3.89	64.71	30.95	14.32	6.23	6.31	2.04	2.05	46.8	18.5	0.8	68.6	1.85	3105.17	0.17	19.37	8.54	5.65	60.5	30.08	14.09	5.98	6.13	1.94	1.94	44.1	16.8	0.76	66.15	1.85	3038.77	0.51	1540	85.1	98.7	1530	86.5	92.2
2	0	Merchant	840	1440		more	71	85	18.35	9.79	5.3	48.8	22.65	9.95	4.95	4.94	1.35	1.45	34.6	13.3	0.71	54.1	1.72	2410.82	0.46	19.16	10.26	5.8	50.7	23.9	10.66	5.15	5.07	1.46	1.56	36.1	13.8	0.74	56.5	1.72	2777.22	0.59	1565.3	81.8	115.5	1538.4	73.5	92.8
3	0	Student	6000	960	Soccer	less	86	105	22.11	9.63	6.31	59.24	29.26	13.39	5.98	5.82	2.01	2.07	43	16.4	0.76	65.55	1.72	2686.67	0.38	22.68	12.04	8.06	58.89	28.84	13.11	5.96	5.84	1.95	1.97	42.7	16.5	0.77	66.95	1.72	3060.45	0.42	1537.1	77.5	93.5	1534.9	55.8	83
6	15	Electrical installer	16080	13440		same	94	95	21.64	9.51	6.68	63.52	29.99	13.39	6.37	6.36	1.93	1.93	45.7	18.4	0.73	70.2	1.8	3148.54	0	22.97	12.87	9.56	64.69	31.69	14.36	6.59	6.58	2.09	2.07	47.2	18.8	0.73	74.25	1.8	3258.31	0	1549.9	65	97.6	1542.4	63.3	91.5
7	0	Draftsman	960	2640	Tennis	less	105	110	21.39	17.9	11.89	54.51	27.14	12.79	5.62	5.43	1.59	1.71	39.7	15.1	0.74	66.4	1.76	2707.15	0.6	20	12.19	7.47	53.78	26.62	12.27	5.48	5.48	1.64	1.75	39	14.7	0.7	61.25	1.75	2905.96	0.41	1541.6	87.3	100.8	1533.4	82.6	92.9
10	0	Electrical planner	13440	2040	Soccer	less	122	129	25.39	18.32	14.42	64.33	32.72	14.65	6.91	6.97	2.1	2.1	46.8	17.5	0.81	78.75	1.76	3380.27	0.88	25.75	20.71	16.65	63.75	32.27	14.4	6.86	6.86	2.04	2.1	46.5	17.9	0.83	80.4	1.77	3424.99	1.11	1537.8	85.8	97.4	1559.1	86.3	112.9
11	0	Student	5320	2280		less	123	125	23.85	14.23	11.74	70.76	35.28	16.09	7.5	7.29	2.23	2.17	51.9	20.4	0.82	82.5	1.86	3095.03	0.26	23.84	15.88	13.14	69.61	34.76	15.91	7.33	7.18	2.19	2.15	50.9	20	0.81	82.75	1.86	3488.68	0.29	1555.3	87.8	110.7	1548.3	81.7	103.3
12	20	Merchant	2040	1920		less	84	115	19.46	2.5	1.56	60.64	29.33	12.96	6.18	6.07	2.11	2.01	43.8	17.2	0.74	62.2	1.79	2605.97	0.32	20.11	2.35	1.52	63.13	30.33	13.49	6.27	6.11	2.22	2.23	45.6	18	0.78	64.65	1.79	2998.11	0.45	1525.9	53.7	75.6	1520.3	48.4	69.5
14	0	Zimmermann	25680	4920		same	110	110	20.15	11.37	7.07	55.13	27.69	13.12	5.46	5.5	1.8	1.82	39.8	14.6	0.73	62.2	1.76	2931.71	0.55	19.31	6.57	3.94	56.01	27.99	12.73	5.71	5.84	1.81	1.9	40.6	15.1	0.72	59.95	1.76	2870.73	0.47	1562.8	89.5	116.9	1532.8	105	101.6
15	0	Merchant	3240	2880	Badminton	less	135	155	23.39	10.31	6.89	59.91	29.81	12.95	6.31	6.42	1.96	2.18	43.9	17.2	0.76	66.8	1.69	2716.79	0.52	23.6	13.89	9.41	58.39	29.13	12.79	6.22	6.16	1.86	2.11	42.6	16.4	0.77	67.8	1.7	3083.49	0.68	1538	83.7	96.7	1556.8	81.4	109.2
18	0	Student	2160	3600	Handball	less	105	130	23.02	12.67	10.32	71.13	35.57	15.76	7.46	7.59	2.37	2.38	52	20.6	0.76	81.45	1.88	3069.73	0.14	22.9	14.67	11.95	69.5	35.02	15.74	7.16	7.41	2.37	2.34	50.9	20	0.78	81.45	1.89	3453.45	0.46	1538.4	106.4	106.2	1538.2	101.3	104
19	0	Student	3240	1560	Breakdance	more	90	109	20.67	5.93	3.57	56.73	27.39	12.99	5.39	5.35	1.79	1.87	41.2	16.1	0.72	60.3	1.71	2560.19	0.04	21.09	6.67	4.09	57.21	27.93	13.51	5.39	5.29	1.79	1.94	41.6	15.9	0.74	61.3	1.71	2907.32	0.08	1563.1	96.7	120.1	1552.4	74.6	103.3
20	3	Student	9240	840	Skateboard	less	86	100	18.52	6.29	3.86	57.54	27.22	12.03	6.04	5.9	1.67	1.58	41	15.9	0.71	61.4	1.82	2910.03	0	19.71	11.92	7.77	57.43	27.76	12.53	5.98	5.89	1.73	1.63	41.3	15.9	0.73	65.2	1.82	3013.02	0.25	1547.3	88.8	105.4	1526.4	61	79
21	0	Electrical installer	7440	1800	Kart	same	106	130	21.85	9.97	7.5	67.7	33.18	15.42	6.63	6.53	2.27	2.33	49.3	19.6	0.77	75.2	1.86	3284.05	0.13	21.86	12.17	9.18	66.27	32.22	15	6.51	6.28	2.19	2.24	48.1	19.2	0.75	75.45	1.86	3290.83	0.01	1540.3	92.7	102	1543.9	90.2	103.6
23	20	Sanitary installer	12000	8400	Floorball	more	113	120	27.56	26.01	23.8	67.7	33.18	15.09	7.11	6.91	2.01	2.06	49.5	20.4	0.96	91.5	1.82	3725.84	2.15	27.8	27.82	26.07	67.63	33.04	15.06	7.12	6.83	2.03	2	49.4	20.4	0.99	93.7	1.84	3785.46	2.52	1527.5	82.6	88.7	1528.9	77.7	87.7
24	20	Merchant	1560	0	Handball	less	84	120	21.3	8.73	5.91	61.74	30.55	13.66	6.38	6.57	1.91	2.04	44.7	16.9	0.76	67.65	1.78	3079.42	0.32	21.75	8.56	5.95	63.5	30.9	13.74	6.44	6.63	1.97	2.12	45.8	17.6	0.81	69.45	1.79	3128.21	0.52	1561.1	109.6	123.9	1553.1	103.2	115.5
26	14	Electrical installer	16680	840	Handball	more	121	130	22.32	10.48	7.47	63.88	31.43	14.56	6.39	6.19	2.06	2.22	46.6	18.2	0.77	71.35	1.79	3179.71	0.24	22.1	12.29	8.76	62.54	30.89	14.39	6.34	6.1	1.99	2.07	45.6	17.6	0.76	71.3	1.8	3178.35	0.21	1536.7	80.7	94.5	1544.1	69.1	95.1
27	0	Polymechanic	11160	8880	Soccer	less	90	85	22.24	10.28	6.78	59.17	28.66	13.17	6.09	5.78	1.79	1.83	42.9	16.6	0.79	65.95	1.72	3033.35	0.45	22.72	11.39	7.65	59.5	28.86	12.77	6.31	6.11	1.75	1.92	43	16.5	0.81	67.15	1.72	3065.87	0.7	1518.6	63.7	74.5	1519.4	57.5	72.6
28	0	Student	5160	6000	Soccer	less	85	110	21.94	12.95	9.2	61.8	29.94	13.06	6.55	6.56	1.88	1.89	44.7	17.7	0.76	71	1.8	2817.97	0.33	23.15	14.85	11.19	64.16	31.28	13.93	6.68	6.64	2	2.03	46.7	18.7	0.81	75.35	1.8	3288.12	0.65	1565.8	83.1	116.4	1559.4	80.5	110.8
29	20	Electrical installer	16980	2280			131	140	24.1	13.36	9.98	64.67	31.41	14.36	6.56	6.38	2.06	2.05	47.2	19	0.84	74.65	1.76	3269.15	0.72	25.76	13.89	11.16	69.19	33.26	14.72	7.2	6.83	2.29	2.21	50.1	20.4	0.87	80.35	1.77	3423.64	0.77	1521.9	62.9	76.5	1521.4	59	74.6
31	0	Electrical installer	5520	1440	Wrestling	less	109	105	22.25	11.78	7.22	54.08	25.9	11.53	5.4	5.42	1.76	1.79	39	15.3	0.71	61.3	1.66	2907.32	0.25	23.21	13.05	8.38	55.82	26.7	11.83	5.61	5.6	1.82	1.84	40.3	16	0.74	64.2	1.66	2985.92	0.38	1535.5	73.3	90.6	1547	92.8	106.9
32	0	Polymechanic	12720	6240	Fitness	more	130	130	21.2	9.61	6.63	62.37	30.43	13.78	6.27	6.15	2.04	2.19	45.1	17.6	0.76	69	1.8	3116.01	0.34	21.42	10.93	7.59	61.81	30.51	13.9	6.36	6.19	2	2.05	44.7	17.1	0.77	69.4	1.8	3126.85	0.48	1550.7	106.6	115.2	1545.8	105.3	111.1
33	0	Electrical installer	13200	6480		more	137	140	21.8	10.45	6.91	59.24	28.34	13.04	5.7	5.86	1.83	1.93	42.9	17	0.74	66.15	1.74	3038.77	0.08	22.42	11.66	7.92	60.03	29.58	13.64	5.97	6.05	1.92	2	43.7	16.9	0.75	67.95	1.74	3087.56	0.3	1532.2	72.9	88.1	1529.3	68.5	84.2
34	0	IT specialist	900	240			75	80	21.55	15.06	9.85	55.55	26.8	12.33	5.57	5.6	1.6	1.71	40.3	15.9	0.76	65.4	1.74	2683.06	0.55	21.84	17.31	11.61	55.44	26.52	12.33	5.49	5.46	1.59	1.65	40.3	16.1	0.76	67.05	1.75	3063.16	0.49	1572.6	115.3	134.5	1563.7	95.6	120.1
36	0	IT specialist	1120	2880			92	110	24.39	18.48	13.24	58.41	28.49	13.36	5.79	5.79	1.78	1.77	42.4	16.4	0.78	71.65	1.71	2833.63	0.46	23.76	18	12.7	57.85	27.88	13.13	5.62	5.64	1.71	1.77	41.8	16.2	0.77	70.55	1.72	3158.02	0.34	1557.6	103.3	118.8	1554.2	82.4	107.8
37	0	Electrical installer	24240	4560	Handball	less	100	115	23.18	16.69	14.05	70.15	34.95	16.19	7	7.09	2.32	2.34	51.1	20.1	0.83	84.2	1.91	3527.98	0.66	24.18	16.11	14.15	73.7	37.28	17.31	7.44	7.5	2.56	2.49	54	21	0.85	87.85	1.91	3626.91	0.75	1553.7	100.4	114.8	1544.2	101.8	108.6
38	15	Electrical installer	18720	7440			159	165	27.54	23.04	22.61	75.54	37.67	15.76	8.28	8.85	2.27	2.51	55.2	22.6	0.91	98.15	1.89	3906.07	1.58	27.45	25.41	24.76	72.69	35.5	14.71	7.98	8.6	1.99	2.22	52.9	22	0.9	97.45	1.88	3887.1	1.29	1539.8	100.5	104.8	1550.8	81.9	105.1
39	0	Merchant	3360	1200	Jogging	less	100	110	20.8	13.86	8.61	53.49	25.69	11.54	5.54	5.37	1.66	1.58	38.6	15.2	0.73	62.1	1.73	2603.56	0.5	21.94	15.03	9.87	55.78	27.11	12.4	5.77	5.59	1.73	1.62	40.5	15.8	0.77	65.65	1.73	3025.22	0.62	1547.6	87.7	105.2	1543	83	99.9
40	0	Electrical installer	11040	0		less	146	140	27.08	20.74	18.72	71.58	35.44	15.75	7.43	7.55	2.32	2.4	52.1	20.9	0.95	90.3	1.83	3693.31	2.03	26.98	18.61	16.8	73.45	35.57	15.52	7.65	7.6	2.38	2.42	53.1	21.6	0.87	90.25	1.83	3691.96	0.78	1538.7	77.1	94.5	1517.7	76.6	79.1
43	15	IT specialist	11400	2880	Boxing	less	71	100	29.07	22.86	20.7	69.85	34.44	15.61	7.17	7.1	2.28	2.28	50.9	20.3	0.99	90.55	1.76	3288.97	2.46	30.61	26.44	25.18	70.07	34.96	16.01	7.18	7.07	2.33	2.37	51.1	20.2	1.01	95.25	1.76	3827.47	2.88	1564	114.6	128.1	1566.6	109.8	128.8
45	0	Draftsman	1800	2640			84	85	24.41	19.73	13.85	56.35	28.07	12.81	6.02	5.82	1.7	1.72	40.8	15.4	0.85	70.2	1.7	2798.7	1.4	24.1	20.72	14.38	55.02	26.83	11.92	5.96	5.78	1.56	1.61	39.5	15.1	0.85	69.4	1.7	3126.85	1.4	1544.6	79.8	99.8	1534.9	64.8	86.7
46	25	Zimmermann	4800	4320		same	84	85	21.38	7.92	5.2	60.5	29.85	13.35	6.13	6.07	2.12	2.18	43.8	16.8	0.76	65.7	1.75	3026.57	0.54	21.13	6.21	4.01	60.54	30.98	13.76	6.36	6.34	2.26	2.26	44.3	16.5	0.75	64.55	1.75	2995.4	0.63	1546.7	84.1	103.1	1549.2	79.6	103
47	0	Constructor	720	1680			88	90	30.13	34.39	34.32	65.48	31.82	14.36	6.86	7	1.74	1.87	47.6	19.7	1.06	99.8	1.82	3511.82	3.84	28.53	31.48	30.08	65.47	30.34	13.2	6.68	6.75	1.78	1.93	46.8	20.1	0.97	95.55	1.83	3835.6	2.33	1522	75.8	82	1539.1	85.9	98.3
49	17	IT specialist	1080	840	Soccer	less	79	95	19.28	15.91	10.65	56.25	27.94	12.8	5.84	5.76	1.75	1.8	40.9	16	0.76	66.9	1.86	2719.2	0.93	19.27	17.64	11.86	55.39	27.31	12.75	5.66	5.58	1.64	1.68	40.2	15.6	0.74	67.25	1.87	3068.58	0.71	1549.7	100.4	112	1558.4	78.2	109.1
51	1	Polymechanic	4320	9360	Soccer	more	130	125	29.19	22.67	20.31	69.29	34.07	15.57	7.12	7.03	2.16	2.2	50.5	20.3	0.89	89.6	1.75	3266.08	1.04	29.32	25.33	22.85	67.35	33.06	15.1	6.95	6.79	2.15	2.06	48.8	19.3	0.89	90.2	1.75	3690.6	1.22	1547.5	88.4	105.4	1556.9	82.2	109.7
52	23	IT specialist	1320	3600			115	130	27.8	26.51	24.86	68.94	35.02	16.32	7.21	6.97	2.24	2.28	50.6	20.1	0.94	93.8	1.84	3367.27	2.17	25.8	25.53	22.03	64.27	31.5	14.67	6.59	6.33	1.92	1.99	46.8	19	0.81	86.3	1.83	3584.9	0.66	1534.9	108	104.4	1554.4	90.8	111.4
53	2	Student	4080	1920	Floorball	more	94	125	23.12	15.7	11.28	60.57	30.59	13.33	6.78	6.79	1.85	1.85	43.9	16.3	0.74	71.85	1.76	3193.26	0.41	23.92	19.06	14.12	59.98	30.09	13.23	6.58	6.65	1.82	1.81	43.4	16.4	0.75	74.1	1.76	3254.24	0.51	1560.8	118.4	127.3	1553.6	80.7	106.7
54	10	Polymechanic	400	1920			125	130	27.84	24.03	19.61	61.99	30.99	14.35	6.44	6.33	1.86	2.01	45.2	17.5	0.9	81.6	1.71	3457.51	1.69	27.71	26.43	21.54	59.96	29.75	13.57	6.27	6.26	1.76	1.89	43.6	16.9	0.88	81.5	1.72	3454.8	1.6	1531.2	80.2	90.4	1539.9	75.1	94.5
55	15	Carpenter	13960	5640	Wrestling	same	130	145	30.11	26.32	24.13	67.57	34.8	14.6	7.93	7.68	2.2	2.39	49.4	19.2	0.92	91.7	1.75	3731.26	2.19	28.18	21.64	18.61	67.39	34.82	14.94	7.7	7.44	2.27	2.48	49.3	18.7	0.87	86	1.75	3576.77	1.58	1536	92.5	98.8	1540.2	100	104.9
56	0	Administrator	2400	0	Fitness	less	92	100	27.86	27.97	27.08	69.72	33.7	14.46	7.68	7.48	1.93	2.15	50.3	20.7	1.05	96.8	1.86	3439.54	3.54	28.46	28.79	28.62	70.78	34.43	14.8	7.82	7.54	2.04	2.23	51.1	21	1.02	99.4	1.87	3939.95	3.09	1564.8	97.1	121.5	1565	107.9	126.1
57	10	Telematician	9840	9840	Soccer	less	110	125	22.04	8.14	5.26	59.34	29.29	13.02	6.38	6.22	1.79	1.87	43.1	16.2	0.79	64.6	1.71	2996.76	0.58	22.78	11.89	7.98	59.17	29.63	13.33	6.29	6.27	1.82	1.91	43	15.9	0.8	67.15	1.72	3065.87	0.78	1539.1	69.3	91.6	1527.5	55.6	77.6
58	15	Electrical installer	12000	960			104	115	21.69	0.08	0.05	63	30.78	14.18	6.19	6.03	2.17	2.21	46	18	0.73	63.05	1.71	2954.75	0	21.11	4.11	2.54	59.11	29.1	13.31	5.99	5.85	1.92	2.03	42.9	16.2	0.72	61.65	1.71	2916.8	0.05	1530.1	67.7	84.4	1542.8	63.7	91.9
60	8	IT specialist	2320	6000	Basketball	less	129	125	29.56	21.38	22.39	82.31	41.61	17.2	9.5	9.49	2.67	2.74	60.1	24.1	0.92	104.7	1.88	3629.87	1.49	27.58	17.61	17.05	79.8	39.84	16.68	8.88	8.88	2.63	2.77	58.1	23.4	0.88	96.85	1.87	3870.84	0.99	1534.8	93.6	98.4	1538.2	94	101.1
62	10	Electrical installer	11880	4560		same	115	105	17.28	4.07	2.15	50.7	24.71	11.67	4.89	4.86	1.65	1.65	36.2	13.3	0.71	52.85	1.75	2975.88	0.51	17.58	3.75	2.02	51.88	25.35	11.89	5.02	4.98	1.72	1.74	37.3	13.9	0.72	53.9	1.75	2706.75	0.56	1560.5	83.2	112.7	1555.3	89.3	111.4
64	0	Student	1280	720	Soccer	more	145	160	21.55	12.39	9.75	68.95	34.21	15.69	7.12	6.96	2.15	2.28	50.3	19.8	0.79	78.7	1.91	3003.48	0.24	23.21	17.35	14.86	70.79	35.26	16.02	7.37	7.24	2.25	2.38	51.4	20.1	0.84	85.65	1.92	3567.28	0.71	1582	105.7	137.4	1577.8	90	127.9
66	10	Electrical installer	15120	1440			127	125	21.05	4.25	2.72	61.23	29.55	13.36	6.15	6.11	1.94	1.99	44.3	17.2	0.71	63.95	1.74	2979.14	0	21.1	6.93	4.53	60.82	29.5	13.04	6.23	6.22	1.96	2.04	43.8	16.9	0.7	65.35	1.76	3017.09	0	1553	79.3	105.7	1549.8	86.5	106.3
67	0	Butcher	11200	20400	Fitness	more	120	120	26.33	18.35	14.03	62.42	30.59	14.22	6.31	6.22	1.89	1.96	45.4	17.7	0.87	76.45	1.7	3317.93	0.99	26.7	21.39	16.57	60.88	29.81	14.04	6.02	6.04	1.86	1.85	44.3	17.3	0.89	77.45	1.7	3345.04	1.31	1543.3	98.9	106.7	1544	81.9	100.3
68	18	Carpenter	0	2880		same	90	95	24.31	19.2	13.6	57.25	26.9	12.63	5.51	5.45	1.63	1.68	41.3	16.7	0.87	70.85	1.71	2814.36	1.15	26.06	22.15	16.7	58.7	27.81	12.88	5.74	5.71	1.73	1.75	42.3	17.1	0.92	75.4	1.7	3289.47	1.71	1516.3	63.2	72.2	1516.3	55.9	69.7
69	10	Cook	12960	7560	Soccer	less	75	70	18.11	4.94	2.91	55.89	26.94	12.14	5.74	5.57	1.75	1.75	39.9	15.1	0.7	58.8	1.8	2839.56	0.24	18.34	7.44	4.4	54.75	26.81	12.06	5.7	5.59	1.74	1.73	39.1	14.5	0.72	59.15	1.8	2849.05	0.54	1535.4	64.2	86.8	1539.7	53	85.3
71	0	Merchant	4560	2880	Floorball	less	108	135	24.17	16.03	13.2	69.15	34.68	15.54	7.46	7.26	2.17	2.25	50.9	20.2	0.81	82.35	1.85	3091.41	0.56	24.36	19.13	16.07	67.93	33.61	15.19	7.12	6.9	2.15	2.25	49.5	19.6	0.82	84	1.86	3522.56	0.69	1554.3	131.1	127.9	1573.9	114.6	135.2
72	15	Electrical installer	12000	5520		same	139	125	25.05	12.81	9.38	63.87	31	14.51	6.15	6.19	2	2.16	46.6	18.4	0.85	73.25	1.71	3231.2	0.62	25.29	13.76	10.14	63.56	31.56	15.09	6.14	6.19	1.99	2.15	46.7	18.1	0.85	73.7	1.71	3243.4	0.74	1537.5	93.7	100.4	1539.6	95.4	102.6
73	0	Student	5160	3120	Floorball	less	93	120	23.66	15.85	10.82	57.48	28.27	12.93	5.83	5.67	1.8	2.05	41.8	16.3	0.8	68.3	1.7	2752.93	0.87	23.49	15.9	10.84	57.36	27.95	13.14	5.53	5.44	1.81	2.02	41.6	16.1	0.78	68.2	1.7	3094.33	0.57	1535.1	75	91	1551.9	74.5	102.9
75	20	IT specialist	3840	6720	Floorball	same	110	130	24.03	16.94	13.08	64.17	30.24	12.11	7.27	7.3	1.7	1.86	46.2	19	0.82	77.25	1.79	2968.55	0.53	24.67	14.98	11.82	67.13	33.57	15.23	7.06	7.04	2.03	2.2	49.3	19.4	0.84	78.95	1.79	3385.69	0.76	1578	96.1	130.6	1573.8	105	131.1
76	0	Constructor	720	2040	Floorball	less	93	100	22.14	13.95	9.95	61.4	30.69	14.28	6.27	6.33	1.9	1.92	44.7	17	0.83	71.35	1.79	2826.41	0.94	22.36	12.31	8.89	63.31	31.81	14.85	6.45	6.48	2.01	2.03	46.3	17.7	0.83	72.2	1.8	3202.74	0.87	1533.4	82.7	93	1534.8	84.8	94.8
77	18	Electrical planner	960	0			114	110	16.41	6.41	3.24	47.31	22.77	10.76	4.61	4.48	1.44	1.49	33.9	12.8	0.68	50.55	1.75	2325.3	0.58	17.38	5.87	3.13	50.17	24.68	11.51	5.02	4.96	1.57	1.63	36.2	13.4	0.71	53.3	1.75	2690.49	0.65	1556.7	86	111.1	1542.3	68.9	93.7
78	10	Electrical installer	18960	720			105	115	27.22	24.14	22	69.15	35.01	16.6	7.01	6.96	2.18	2.26	51.2	20.6	0.93	91.15	1.83	3716.35	1.81	25.72	24.26	21.03	65.67	32.21	15.14	6.61	6.47	1.97	2.02	48.1	19.6	0.87	86.7	1.84	3595.74	1.07	1542.9	72.2	95.5	1553.4	74	103.8
79	0	Student	4560	12000	Handball	less	91	125	21.99	9.84	8.08	74.07	36.68	16.52	7.76	7.63	2.33	2.45	53.9	21.1	0.8	82.15	1.93	3086.6	0	21.51	13.36	10.88	70.57	35.3	15.96	7.47	7.38	2.2	2.29	51.3	19.7	0.8	81.45	1.95	3453.45	0.29	1516.4	75.8	77.9	1525.3	71.2	82.4
80	8	Merchant	13680	0	Soccer	less	100	100	23.77	14.13	10.7	65.05	31.94	14.94	6.44	6.53	1.97	2.06	47.8	19	0.8	75.75	1.78	2932.41	0.23	24.85	15.87	12.48	66.17	32.25	14.38	6.84	6.95	1.99	2.09	48.3	19.4	0.84	78.65	1.78	3377.56	0.71	1553.9	91.3	111.2	1553.6	89.8	110.4
82	2	Telematician	5000	8640	Basketball	more	85	110	19.4	6.02	3.78	59.07	27.87	12.56	5.8	5.88	1.83	1.8	42.6	17.1	0.76	62.85	1.8	2621.63	0.27	19.99	8.16	5.32	59.88	28.65	13.06	5.85	5.93	1.89	1.92	43.3	17.2	0.74	65.2	1.81	3013.02	0.17	1545.5	106.1	111.3	1544.7	93.6	105.6
83	3	Carpenter	1080	1200	Fitness	same	161	150	26.76	13.19	10.65	70.1	34.91	16.73	6.43	6.45	2.6	2.7	51.4	19.9	0.8	80.75	1.74	3434.48	0	25.11	7.53	5.77	70.88	35.17	16.84	6.44	6.41	2.72	2.76	52	20.2	0.78	76.65	1.75	3323.35	0	1569.7	107.3	129.1	1553.7	107.7	117.8
85	0	Merchant	1920	1680	Soccer	less	81	80	20.79	12.26	7.33	52.47	25.99	11.91	5.34	5.58	1.57	1.58	37.9	14	0.74	59.8	1.7	2548.15	0.58	20.63	9.84	5.91	54.14	27.23	12.16	5.78	6	1.64	1.65	38.7	13.7	0.74	60.05	1.71	2873.44	0.54	1565.1	127.3	134.1	1543.7	97.1	106.3
86	0	Technical planner	1920	840			98	92	20.66	11.21	7.94	62.91	31.04	14.73	6.07	6.12	2.01	2.12	46	18.2	0.75	70.85	1.85	2814.36	0.21	21.16	12.03	8.81	64.39	31.58	14.92	6.18	6.28	2.05	2.15	47	18.6	0.76	73.2	1.86	3229.85	0.13	1536.8	81.7	95	1528.3	71.1	84.5
87	0	Student	3880	4320		less	93	100	21.87	4.42	2.97	64.23	31.57	14.9	6.26	6.09	2.17	2.15	46.7	17.6	0.75	67.2	1.75	3067.23	0	22.61	6.13	4.29	65.66	32.2	15.28	6.26	6.15	2.24	2.26	47.8	18.3	0.77	69.95	1.76	3141.76	0	1556.3	77.8	107.5	1546.3	70.7	97.3
88	20	Automation technician	8400	1200		less	95	140	29.85	28.59	29.31	73.19	36.82	16.62	7.72	7.77	2.28	2.42	53.6	21.7	0.92	102.5	1.85	3576.86	1.75	29.64	29.69	30.15	71.4	35.9	16.34	7.48	7.56	2.2	2.32	52.1	20.8	0.92	101.55	1.85	3998.22	1.77	1523.6	79.8	84.7	1536.9	81	94.8
90	7	Electrical installer	9600	6000			119	125	19.33	6.89	4.55	61.55	29.35	13.47	6.03	5.77	1.98	2.09	44.6	18	0.72	66.1	1.85	3037.41	0.03	19.21	7.34	4.91	61.99	29.4	13.48	6.03	5.78	2.01	2.1	44.8	18.1	0.72	66.9	1.87	3059.1	0	1528.8	55.1	78.3	1517.9	47.4	67.3
91	0	Constructor	960	960	Volleyball		105	102	17.41	2.72	1.79	64.01	31.19	12.9	7.14	6.94	2.09	2.12	46.1	18.3	0.72	65.8	1.94	2692.7	0.41	17.04	5.3	3.47	61.93	30.03	12.89	6.63	6.48	1.99	2.04	44.4	17.5	0.72	65.4	1.96	3018.44	0.45	1551.7	121.3	122	1533.7	86.6	94.8
92	0	Cook	13920	2160	Soccer	less	104	115	24.4	11.98	9.62	70.68	35.56	16.35	7.23	7.31	2.32	2.35	51.7	19.8	0.8	80.3	1.81	3422.28	0.14	23.94	14.02	11.11	68.19	34.25	15.72	7.01	7.04	2.2	2.28	49.9	19.3	0.81	79.3	1.82	3395.18	0.48	1539.6	78.6	95.8	1547.3	78.6	101.3
96	5	Merchant	2160	4560	Soccer	less	129	131	25.71	17.19	13.6	65.5	31.38	13.82	6.69	6.62	2.08	2.17	47.1	18.8	0.82	79.1	1.75	3013.12	0.54	26.27	18.8	15.35	66.3	32.44	14.58	6.74	6.77	2.13	2.23	48	18.8	0.84	81.65	1.76	3458.87	0.8	1542	80.3	98.2	1532.6	74.2	88.9
98	0	IT specialist	4800	8160	Icehockey	same	119	130	21.76	12.9	9.67	65.28	32.47	14.72	6.83	6.7	2.01	2.21	47.8	18.8	0.76	74.95	1.86	2913.14	0.31	22.44	12.85	9.82	66.58	33.45	15.17	7	6.9	2.11	2.27	48.9	19.1	0.78	76.4	1.85	3316.58	0.46	1557.4	101.2	117.8	1550.7	94.6	110.3
99	0	Student	2820	960		more	82	85	23.11	21.23	15.15	56.2	29.14	12.9	6.25	6.35	1.77	1.87	41	15.1	0.86	71.35	1.76	2826.41	1.88	22.43	17.95	12.38	56.62	28.47	12.75	6.04	6.07	1.73	1.88	41.1	15.6	0.77	69	1.75	3116.01	0.86	1567.1	82.6	117.2	1564.7	98.6	122
101	0	Electrical installer	18000	5040		less	105	100	19.9	7.49	4.44	54.91	26.33	11.51	5.55	5.56	1.83	1.89	39.3	15.3	0.7	59.35	1.73	2854.47	0.34	20.23	9.1	5.46	54.54	26.83	11.84	5.65	5.65	1.84	1.85	39.4	15.1	0.71	60	1.72	2872.08	0.49	1521.2	60.5	75.1	1511.9	58.2	67.4
102	0	Draftsman	7440	6240		more	81	90	18.24	9.17	5.05	50.05	23.5	10.47	5.22	5.13	1.35	1.33	35.5	13.6	0.72	55.1	1.74	2434.91	0.44	19.58	8.49	5.03	54.17	25.68	11.81	5.41	5.39	1.54	1.52	38.7	14.8	0.75	59.2	1.74	2850.4	0.28	1525.2	71.2	82.3	1519.5	53.1	70.8
104	0	Student	5340	3360	Track and field	less	103	110	20.83	5.27	3.13	56.37	27.25	12.07	5.76	5.76	1.82	1.84	40.6	15.5	0.69	59.5	1.69	2858.53	0.03	20.95	5.22	3.13	56.92	27.15	12.05	5.7	5.75	1.8	1.86	40.9	15.8	0.71	60.05	1.69	2873.44	0.03	1572.1	108.6	131.4	1562.7	83.4	114.3

## Sheet: Codebook
Variable name	Comment
N	Random patient ID
Cigarettes/day	Numbers of cigarettes per day
Occpuation	Occupation
total-physical-activity-MET-1	Metabolic equivalent of task (MET) of physical activity at baseline
military_total-physical-activity-MET-2	Metabolic equivalent of task (MET) of physical activity during basic training
Type of sport	Type of sport performed in leisure time
Sport continued	Did the person continue to do this sports activity during basic training (on weekends, etc.)?
max_Gripstrength-1	Maximum gripostrength measured at baseline
max_Gripstrength-2	Maximum gripostrength measured at follow up
BMI value-1	Body Mass Index at baseline
Relative fat mass value-1	Relative fat mass at baseline
Absolute fat mass value-1	Absolute fat mass at baseline
Fat-free mass value	Fat free mass at baseline
Skeletal muscle mass value-1	Skeletal muscle mass at baseline
SMM (torso) value-1	Skeletal muscle mass torso at baseline
SMM (RL) value-1	Skeletal muscle mass right leg at baseline
SMM (LL) value-1	Skeletal muscle mass left leg at baseline
SMM (LA) value-1	Skeletal muscle mass left arm at baseline
SMM (RA) value-1	Skeletal muscle mass right arm at baseline
Total Body Water value-1	Total body water at baseline
Extracellular water value-1	Extracellular water at baseline
waist circumference value-1	Waist circumference at baseline
Weight value-1	Weight at baseline
Height value-1	Height at baseline
Total energy expenditure value-1	Total energy expenditure at baseline
visceral adipose tissue value-1	Visceral adipose tissue at baseline
BMI value-2	Body Mass Index at follow-up
Relative fat mass value-2	Relative fat mass at follow-up
Absolute fat mass value-2	Absolute fat mass at follow-up
Fat-free mass value-2	Fat free mass at follow-up
Skeletal muscle mass value-2	Skeletal muscle mass at follow-up
SMM (torso) value-2	Skeletal muscle mass torso at follow-up
SMM (RL) value-2	Skeletal muscle mass right leg at follow-up
SMM (LL) value-2	Skeletal muscle mass left leg at follow-up
SMM (LA) value-2	Skeletal muscle mass left arm at follow-up
SMM (RA) value-2	Skeletal muscle mass right arm at follow-up
Total Body Water value-2	Total body water at follow-up
Extracellular water value-2	Extracellular water at follow-up
waist circumference value-2	Waist circumference at follow-up
Weight value-2	Weight at follow-up
Height value-2	Height at follow-up
Total energy expenditure value-2	Total energy expenditure at follow-up
visceral adipose tissue value-2	Visceral adipose tissue at follow-up
SOS-1	SOS at baseline
BUA-1	BUA at baseline
BQI-1	BQI at baseline
SOS-2	SOS at follow-up
BUA-2	BUA at follow-up
BQI-2	BQI at follow-up
